# Supplementary material for: Novel benzoxazole derivatives DCPAB and HPAB attenuate Th1 cell-mediated inflammation through T-bet suppression
Source: PubMed Central journal article supplement (PMC5294415; doi:10.1038/srep42144), 2017-02-07
Supplement: srep42144-s1.pdf [file srep42144-s1.pdf]

**Novel benzoxazole derivatives DCPAB and HPAB attenuate Th1 cell-mediated inflammation through T-bet suppression**

Yeon Ji Oh<sup>1</sup>, Darong Kim<sup>1</sup>, Sera Oh<sup>1</sup>, Eun Jung Jang<sup>1</sup>, Hee Yeon Won<sup>1</sup>, Hana Jeong<sup>1</sup>, Mi Gyeong Jeong<sup>1</sup>, Hea-Young Park Choo<sup>1</sup>, and Eun Sook Hwang<sup>1\*</sup>

<sup>1</sup>College of Pharmacy and Graduate School of Pharmaceutical Sciences, Ewha Womans University, Seoul 03760, Korea

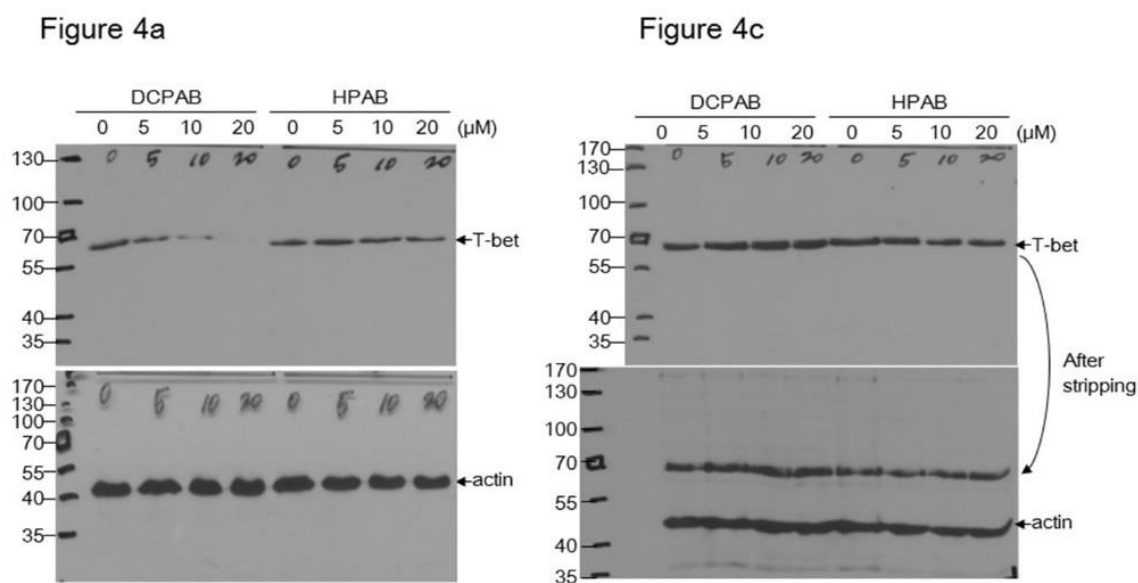

**Supplementary Figure 1.** Uncropped original images of immunoblot analysis as shown in Figure 4a and 4c.

Figure 5b

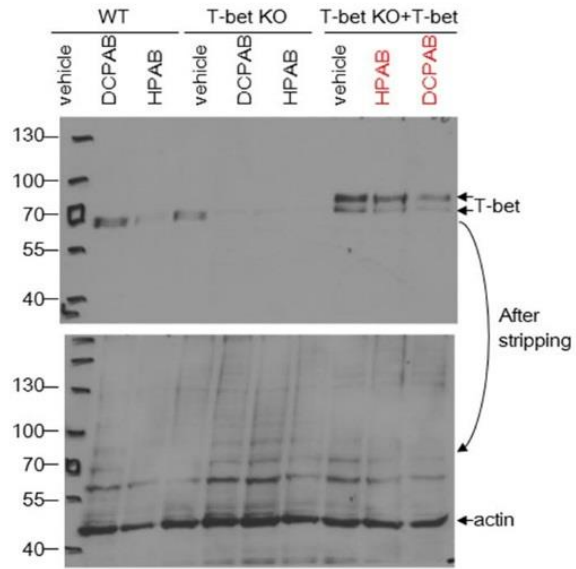

Supplementary Figure 2. Uncropped images of immunoblot analysis as shown in Figure 5b.

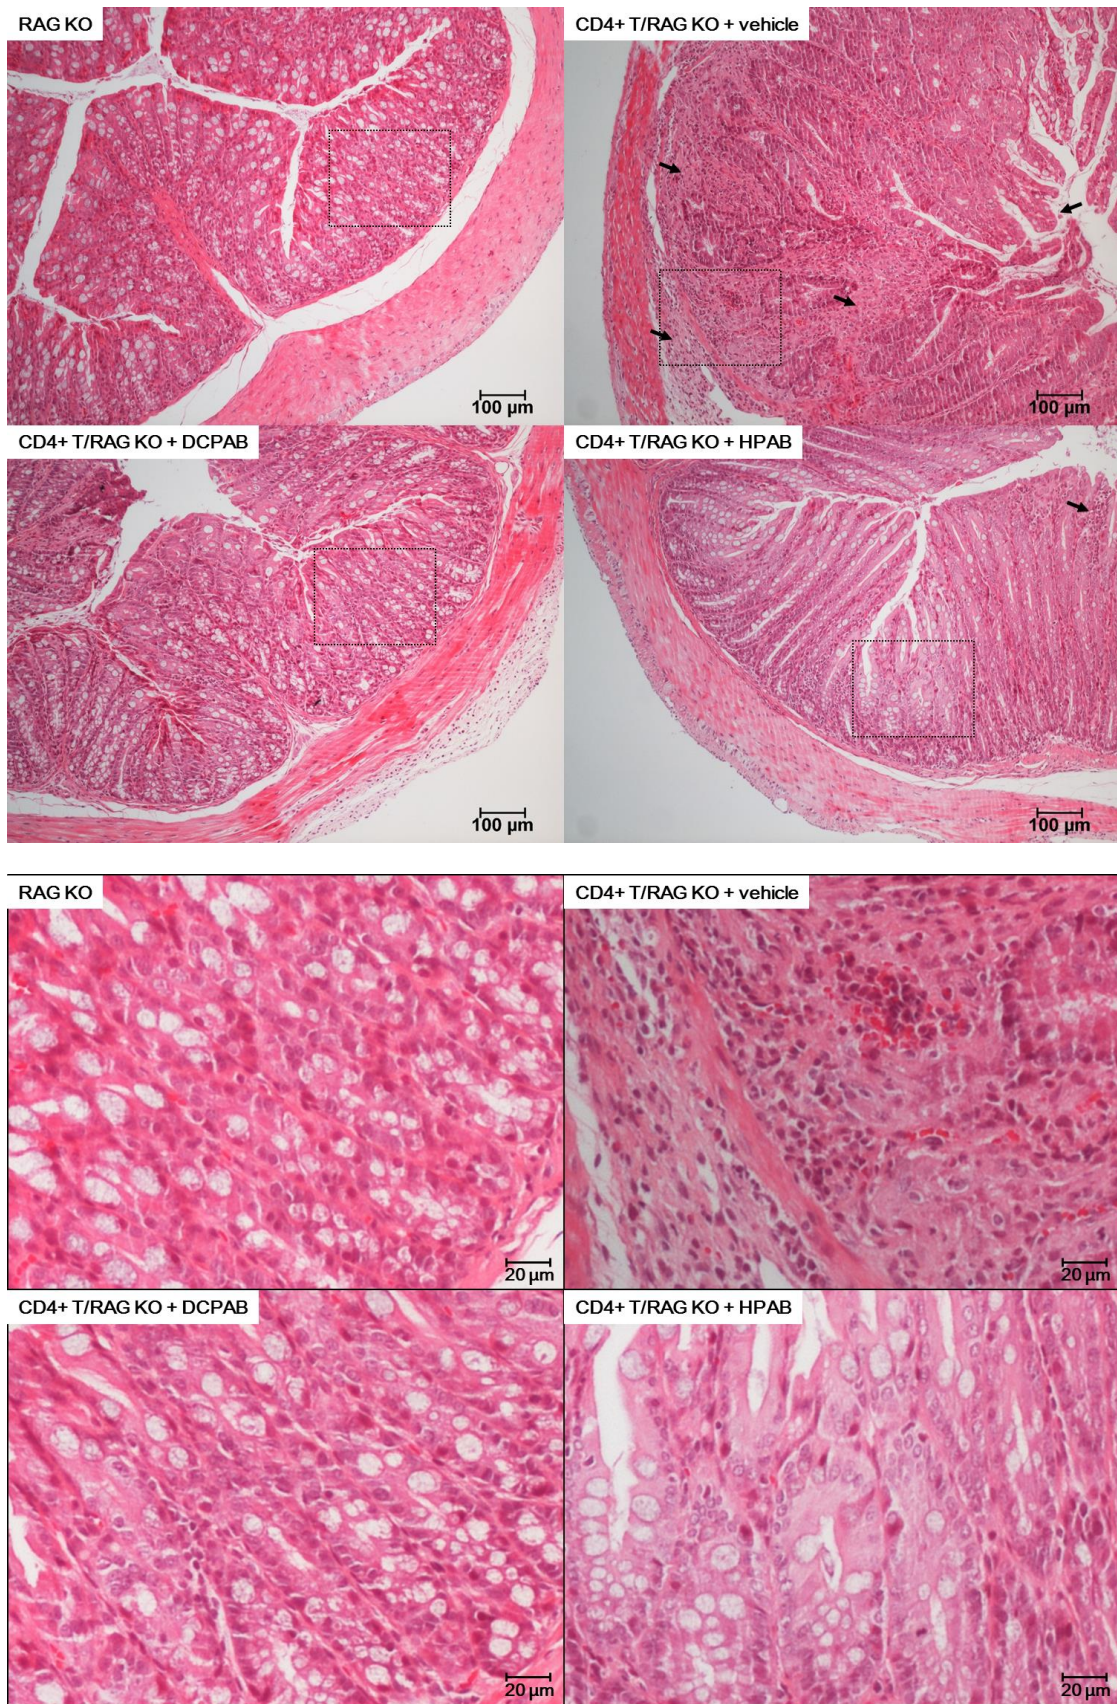

**Supplementary Figure 3.** Unabridged microscopic images of colonic tissues as shown in Figure 6b.
